# Supplementary material
Source: PubMed Central journal article supplement (PMC3904764)
Supplement: ci400632y_si_001.pdf [file ci400632y_si_001.pdf]

# Increasing the Coverage of Medicinal Chemistry-Relevant Space in Commercial Fragments Screening

*N. Yi Mok, Ruth Brenk and Nathan Brown*

## Contents

|          |                                                                                             |    |
|----------|---------------------------------------------------------------------------------------------|----|
| Table S1 | Frequent bioactive ChEMBL substructures that have<br>low similarity to commercial fragments | S2 |
|----------|---------------------------------------------------------------------------------------------|----|

**Table S1.** The most frequently occurring substructures derived from a minimum of 100 bioactive ChEMBL compounds that have low similarity to commercial fragments. The frequency occurrence of each substructure is denoted below the structure.

|                                                                                            |                                                                                            |                                                                                             |                                                                                              |
|--------------------------------------------------------------------------------------------|--------------------------------------------------------------------------------------------|---------------------------------------------------------------------------------------------|----------------------------------------------------------------------------------------------|
| 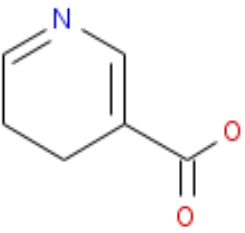<br>618   | <br>466   | <br>439   | <br>413   |
| <br>271   | <br>246   | <br>215   | <br>213   |
| <br>205 | <br>198 | <br>188 | <br>181 |
| <br>180 | <br>169 | <br>168 | <br>159 |

|                                                                                            |                                                                                            |                                                                                             |                                                                                              |
|--------------------------------------------------------------------------------------------|--------------------------------------------------------------------------------------------|---------------------------------------------------------------------------------------------|----------------------------------------------------------------------------------------------|
| 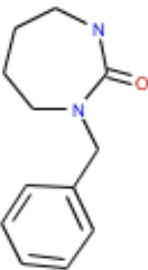<br>153   | <br>147   | <br>142   | <br>140   |
| <br>139   | <br>139   | <br>138   | <br>134   |
| <br>133  | <br>129  | <br>127  | <br>123  |
| <br>121 | <br>120 | <br>109 | <br>106 |
| <br>106 | <br>101 | <br>100 |                                                                                              |
